# Supplementary material for: Perceived Racial Discrimination, Psychological Distress, and Suicidal Behavior in Adolescence: Secondary Analysis of Cross-Sectional Data from a Statewide Youth Survey
Source: MDPI journal article supplement (doi:10.3390/healthcare12101011), 2024-05-14

## Supplementary Materials

### Perceived racial discrimination, psychological distress, and suicidal behavior in adolescence: Secondary analysis of cross-sectional data from a statewide youth survey

**Table S1.** Comparison of Student Demographics: KIP 2021 and Kentucky Department of Education Enrollment 2020-2021

|                              |                                     | KIP 2021 |        | KY Total Enrollment<br>2020-2021 <sup>b</sup> |        | KY Enrollment w/o Jefferson<br>County 2020-2021 <sup>c</sup> |        |
|------------------------------|-------------------------------------|----------|--------|-----------------------------------------------|--------|--------------------------------------------------------------|--------|
| Characteristics              |                                     | <i>n</i> | (%)    | <i>n</i>                                      | (%)    | <i>n</i>                                                     | (%)    |
| Overall                      |                                     | 93,812   | (100)  | 217,566                                       | (100)  | 185,515                                                      | (100)  |
| School Grade                 |                                     |          |        |                                               |        |                                                              |        |
|                              | 6                                   | 25,552   | (27.2) | 54,479                                        | (25.0) | 46,490                                                       | (25.1) |
|                              | 8                                   | 26,712   | (28.5) | 56,558                                        | (26.0) | 48,281                                                       | (26.0) |
|                              | 10                                  | 23,632   | (25.2) | 56,352                                        | (25.9) | 47,633                                                       | (25.7) |
|                              | 12                                  | 17,916   | (19.1) | 50,177                                        | (23.1) | 43,111                                                       | (23.2) |
| Gender Identity <sup>a</sup> |                                     |          |        |                                               |        |                                                              |        |
|                              | Female                              | 42,065   | (44.8) | 106,035                                       | (48.7) | 90,116                                                       | (48.6) |
|                              | Male                                | 46,052   | (49.1) | 111,531                                       | (51.3) | 95,399                                                       | (51.4) |
|                              | Questioning/unsure                  | 1,524    | (1.6)  |                                               |        |                                                              |        |
|                              | Not listed                          | 2,103    | (2.2)  |                                               |        |                                                              |        |
|                              | Prefer not to say                   | 1,756    | (1.9)  |                                               |        |                                                              |        |
| Race-Ethnicity <sup>a</sup>  |                                     |          |        |                                               |        |                                                              |        |
|                              | Non-Hispanic White                  | 66,829   | (71.2) | 162,853                                       | (74.9) | 149,495                                                      | (80.6) |
|                              | Black                               | 5,920    | (6.3)  | 24,480                                        | (11.3) | 12,356                                                       | (6.7)  |
|                              | Hispanic or Latino                  | 8,265    | (8.8)  | 16,650                                        | (7.7)  | 12,898                                                       | (7.0)  |
|                              | Asian                               | 1,227    | (1.4)  | 3,867                                         | (1.8)  | 2,599                                                        | (1.4)  |
|                              | Native Hawaiian or Pacific Islander | 148      | (0.2)  | 298                                           | (0.1)  | 253                                                          | (0.1)  |
|                              | American Indian or Alaska Native    | 918      | (1.0)  | 293                                           | (0.1)  | 257                                                          | (0.1)  |
|                              | Multiracial                         | 5,619    | (6.0)  | 9,125                                         | (4.2)  | 7,657                                                        | (4.1)  |
|                              | Other                               | 1,743    | (1.9)  |                                               |        |                                                              |        |
| Rural                        |                                     |          |        |                                               |        |                                                              |        |
|                              | Yes                                 | 52,087   | (55.5) | 107,506                                       | (49.4) | 107,506                                                      | (58.0) |
|                              | No                                  | 41,725   | (44.5) | 110,060                                       | (50.6) | 77,895                                                       | (42.0) |

<sup>a</sup>Overall characteristics may not add to 100% due to missing data; <sup>b</sup>Total enrollment for Grades 6, 8, 10, and 12 with Jefferson County School District; <sup>c</sup>Total enrollment for Grades 6, 8, 10, and 12 without Jefferson County School District.

**Table S2.** Characteristics of middle school students

|                                              |                                            | Overall  |        | SPD      |        | Suicide Ideation |        | Suicide Attempt |        |
|----------------------------------------------|--------------------------------------------|----------|--------|----------|--------|------------------|--------|-----------------|--------|
| Characteristics                              |                                            | <i>n</i> | (%)    | <i>n</i> | (%)    | <i>n</i>         | (%)    | <i>n</i>        | (%)    |
| Overall                                      |                                            | 52,264   | (100)  | 9,217    | (17.6) | 6,179            | (11.8) | 3,876           | (7.4)  |
| School Grade                                 |                                            |          |        |          |        |                  |        |                 |        |
|                                              | 6                                          | 25,552   | (48.9) | 3,823    | (15.0) | 2,443            | (9.6)  | 1,669           | (6.5)  |
|                                              | 8                                          | 26,712   | (51.1) | 5,394    | (20.2) | 3,736            | (14.0) | 2,207           | (8.3)  |
| Gender Identity <sup>a</sup>                 |                                            |          |        |          |        |                  |        |                 |        |
|                                              | Female                                     | 22,866   | (43.7) | 4,791    | (21.0) | 3,114            | (13.6) | 1,974           | (8.6)  |
|                                              | Male                                       | 25,821   | (49.4) | 2,729    | (10.6) | 1,733            | (6.7)  | 1,101           | (4.3)  |
|                                              | Questioning/unsure                         | 993      | (1.9)  | 559      | (56.3) | 431              | (43.4) | 241             | (24.3) |
|                                              | Not listed                                 | 1,220    | (2.3)  | 714      | (58.5) | 595              | (48.8) | 353             | (28.9) |
|                                              | Prefer not to say                          | 1,181    | (2.3)  | 401      | (34.0) | 290              | (24.6) | 195             | (16.5) |
| Sexual Orientation <sup>a</sup>              |                                            |          |        |          |        |                  |        |                 |        |
|                                              | Heterosexual                               | 32,689   | (62.6) | 4,075    | (12.5) | 2,476            | (7.6)  | 1,459           | (4.5)  |
|                                              | Gay or lesbian                             | 2,893    | (5.5)  | 1,464    | (50.6) | 1,218            | (42.1) | 763             | (26.4) |
|                                              | Questioning/unsure                         | 2,768    | (5.3)  | 761      | (27.5) | 536              | (19.4) | 306             | (11.1) |
|                                              | Not listed                                 | 3,717    | (7.1)  | 1,437    | (38.7) | 1,151            | (31.0) | 682             | (18.4) |
|                                              | Prefer not to say                          | 4,861    | (9.3)  | 834      | (17.2) | 421              | (8.7)  | 322             | (6.6)  |
| Race-Ethnicity <sup>ab</sup>                 |                                            |          |        |          |        |                  |        |                 |        |
|                                              | NH White (White)                           | 35,439   | (67.8) | 6,126    | (17.3) | 3,992            | (11.3) | 2,290           | (6.5)  |
|                                              | NH Black (Black)                           | 3,555    | (6.8)  | 534      | (15.0) | 442              | (12.4) | 327             | (9.2)  |
|                                              | Hispanic                                   | 4,839    | (9.3)  | 931      | (19.2) | 648              | (13.4) | 492             | (10.2) |
|                                              | NH Asian/NH/PI<br>(Asian/Pacific Islander) | 700      | (1.3)  | 112      | (16.0) | 74               | (10.6) | 41              | (5.9)  |
|                                              | NH AI/AN (Native American)                 | 650      | (1.2)  | 137      | (21.1) | 85               | (13.1) | 70              | (10.8) |
|                                              | NH Other (Other)                           | 1,348    | (2.6)  | 268      | (19.9) | 182              | (13.5) | 133             | (9.9)  |
|                                              | NH Multiracial (Multiracial)               | 3,242    | (6.2)  | 799      | (24.7) | 572              | (17.6) | 378             | (11.7) |
| Rural                                        |                                            |          |        |          |        |                  |        |                 |        |
|                                              | Yes                                        | 28,925   | (55.3) | 5,322    | (18.4) | 3,541            | (12.2) | 2,233           | (7.7)  |
|                                              | No                                         | 23,339   | (44.7) | 3,895    | (16.7) | 2,638            | (11.3) | 1,643           | (7.0)  |
| Perceived Racial Discrimination <sup>a</sup> |                                            |          |        |          |        |                  |        |                 |        |
|                                              | Yes                                        | 2,557    | (4.9)  | 1,018    | (39.8) | 763              | (29.8) | 529             | (20.7) |
|                                              | No/Not sure                                | 43,225   | (82.7) | 7,178    | (16.6) | 4,778            | (11.1) | 2,818           | (6.5)  |

<sup>a</sup>Overall characteristics may not add to 100% due to missing data; <sup>b</sup>NH= Non-Hispanic; NH/PI=Native Hawaiian or Pacific Islander; AI/AN=American Indian or Alaska Native

**Table S3.** Characteristics of high school students

|                                              |  | Overall  |        | SPD      |        | Suicide Ideation |        | Suicide Attempt |        |
|----------------------------------------------|--|----------|--------|----------|--------|------------------|--------|-----------------|--------|
| Characteristics                              |  | <i>n</i> | (%)    | <i>n</i> | (%)    | <i>n</i>         | (%)    | <i>n</i>        | (%)    |
| Overall                                      |  | 41,548   | (100)  | 10,093   | (24.3) | 6,345            | (15.3) | 3,048           | (7.3)  |
| School Grade                                 |  |          |        |          |        |                  |        |                 |        |
| 10                                           |  | 23,632   | (56.9) | 5,715    | (24.2) | 3,694            | (15.6) | 1,870           | (7.9)  |
| 12                                           |  | 17,916   | (43.1) | 4,378    | (24.4) | 2,651            | (14.8) | 1,178           | (6.6)  |
| Gender Identity <sup>a</sup>                 |  |          |        |          |        |                  |        |                 |        |
| Female                                       |  | 19,199   | (46.2) | 5,792    | (30.2) | 3,354            | (17.5) | 1,618           | (8.4)  |
| Male                                         |  | 20,231   | (48.7) | 3,065    | (15.1) | 2,071            | (10.2) | 967             | (4.8)  |
| Questioning/unsure                           |  | 531      | (1.3)  | 330      | (62.2) | 253              | (47.7) | 112             | (21.1) |
| Not listed                                   |  | 883      | (2.1)  | 596      | (67.5) | 452              | (51.2) | 227             | (25.7) |
| Prefer not to say                            |  | 575      | (1.4)  | 283      | (49.2) | 196              | (34.1) | 109             | (19.0) |
| Sexual Orientation <sup>a</sup>              |  |          |        |          |        |                  |        |                 |        |
| Heterosexual                                 |  | 30,199   | (72.7) | 5,461    | (18.1) | 3,124            | (10.3) | 1,439           | (4.8)  |
| Gay or lesbian                               |  | 2,551    | (6.1)  | 1,375    | (53.9) | 1,029            | (40.3) | 512             | (20.1) |
| Questioning/unsure                           |  | 1,575    | (3.8)  | 704      | (44.7) | 495              | (31.4) | 224             | (14.2) |
| Not listed                                   |  | 2,879    | (6.9)  | 1,527    | (53.0) | 1,122            | (39.0) | 514             | (17.9) |
| Prefer not to say                            |  | 1,686    | (4.1)  | 471      | (27.9) | 255              | (15.1) | 136             | (8.1)  |
| Race-Ethnicity <sup>ab</sup>                 |  |          |        |          |        |                  |        |                 |        |
| NH White (White)                             |  | 31,390   | (75.6) | 7,637    | (24.3) | 4,726            | (15.1) | 2,140           | (6.8)  |
| NH Black (Black)                             |  | 2,365    | (5.7)  | 473      | (20.0) | 319              | (13.5) | 177             | (7.5)  |
| Hispanic                                     |  | 3,426    | (8.3)  | 822      | (24.0) | 517              | (15.1) | 296             | (8.6)  |
| NH Asian/NH/PI<br>(Asian/Pacific Islander)   |  | 675      | (1.6)  | 139      | (20.6) | 88               | (13.0) | 40              | (5.9)  |
| NH AI/AN (Native American)                   |  | 268      | (0.7)  | 63       | (23.5) | 40               | (14.9) | 31              | (11.6) |
| NH Other (Other)                             |  | 395      | (1.0)  | 104      | (26.3) | 67               | (17.0) | 44              | (11.1) |
| NH Multiracial (Multiracial)                 |  | 2,377    | (5.7)  | 719      | (30.3) | 504              | (21.2) | 269             | (11.3) |
| Rural                                        |  |          |        |          |        |                  |        |                 |        |
| Yes                                          |  | 23,162   | (55.8) | 5,760    | (24.9) | 3,603            | (15.6) | 1,828           | (7.9)  |
| No                                           |  | 18,386   | (44.3) | 4,333    | (23.6) | 2,742            | (14.9) | 1,220           | (6.6)  |
| Perceived Racial Discrimination <sup>a</sup> |  |          |        |          |        |                  |        |                 |        |
| Yes                                          |  | 3,018    | (7.3)  | 1,122    | (37.2) | 802              | (26.6) | 422             | (14.0) |
| No/Not sure                                  |  | 34,581   | (83.2) | 8,084    | (23.4) | 4,992            | (14.4) | 2,259           | (6.5)  |

<sup>a</sup>Overall characteristics may not add to 100% due to missing data; <sup>b</sup>NH= Non-Hispanic; NH/PI=Native Hawaiian or Pacific Islander; AI/AN=American Indian or Alaska Native

**Figure S1.** Prevalence of perceived racial discrimination among racial and ethnic minorities stratified by school level

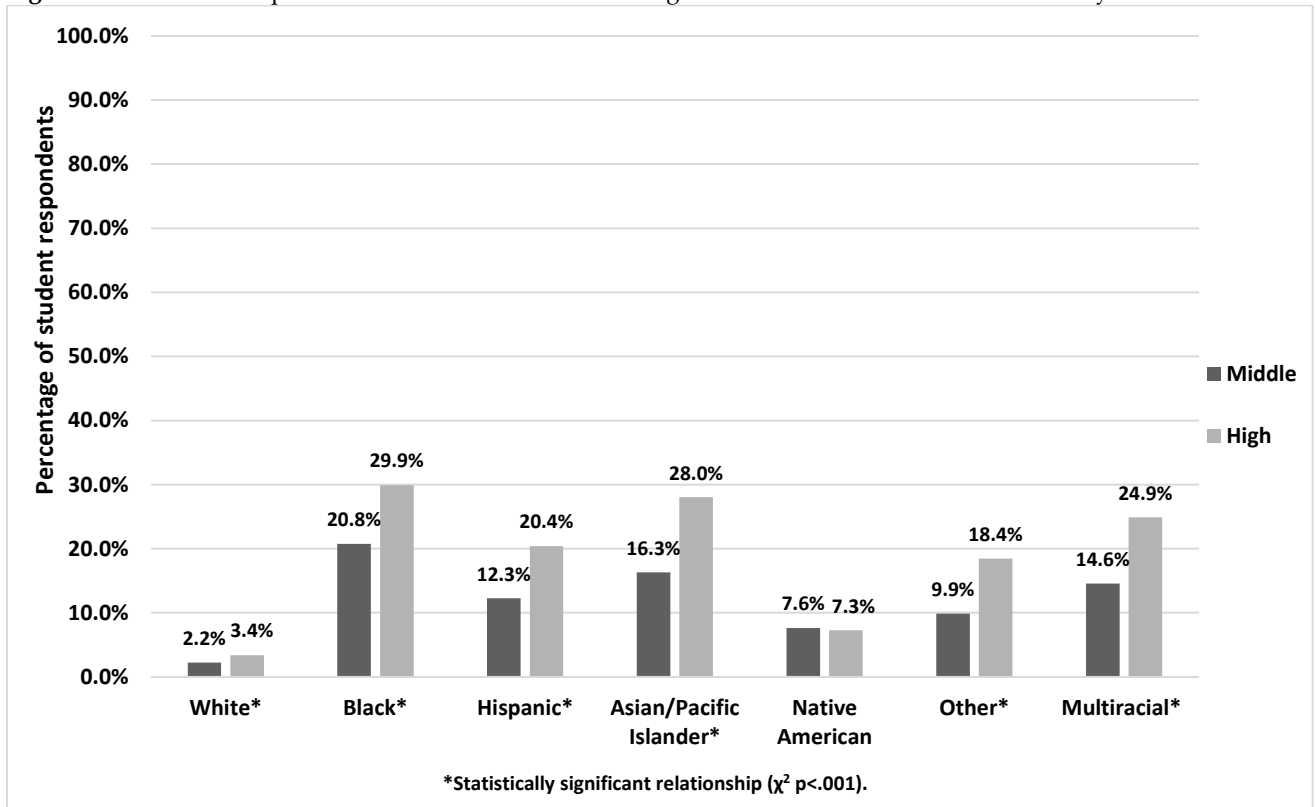

Note: For all racial/ethnic groups besides Native Americans, high schoolers reported significantly higher rates of PRD than middle school students. The following are Cramer's V for each racial/ethnic group with a significant relationship from left to right: 0.04, 0.10, 0.11, 0.14, -0.01, 0.11, 0.13.

Figure S2. Prevalence of SPD and suicidality among racial and ethnic minorities in middle school

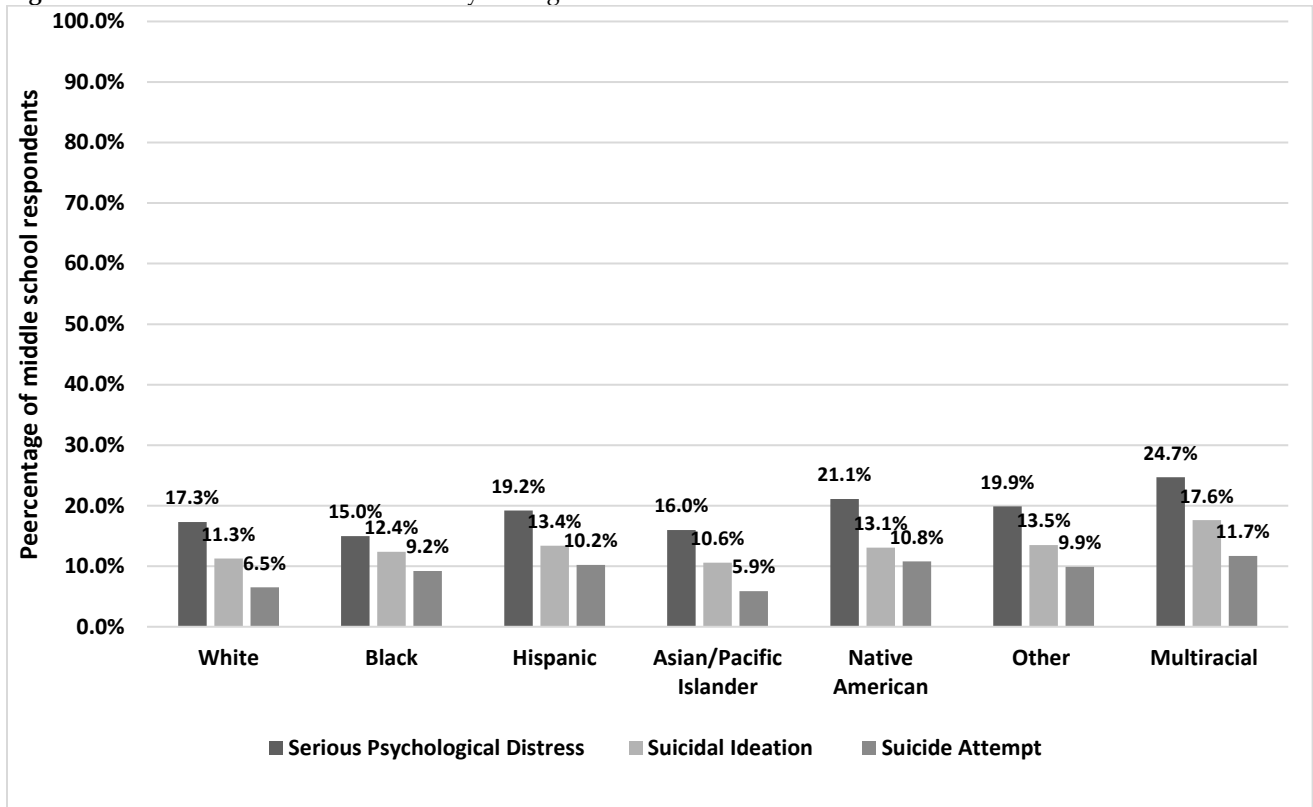

Figure S3. Prevalence of SPD and suicidality among racial and ethnic minorities in high school

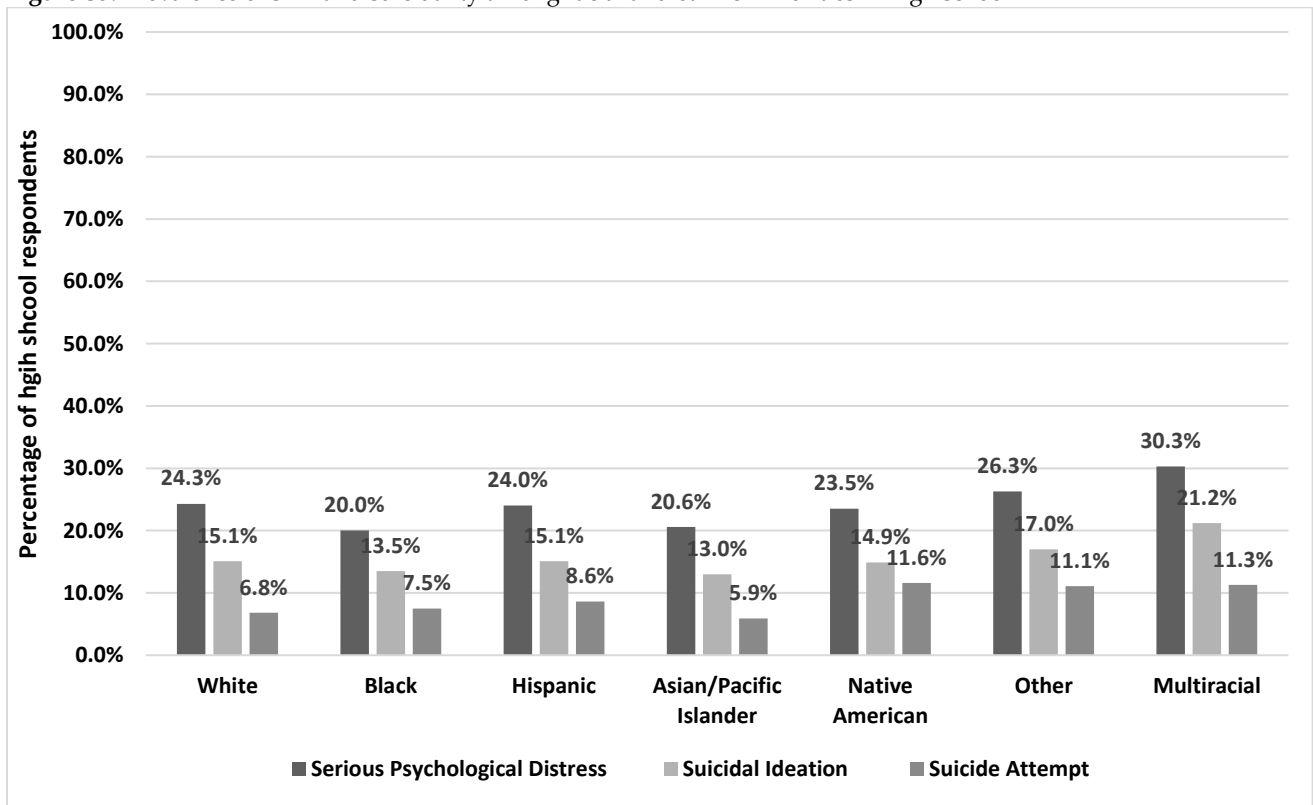

**Figure S4.** Adjusted odds of SPD and among racial and ethnic minorities stratified by school level

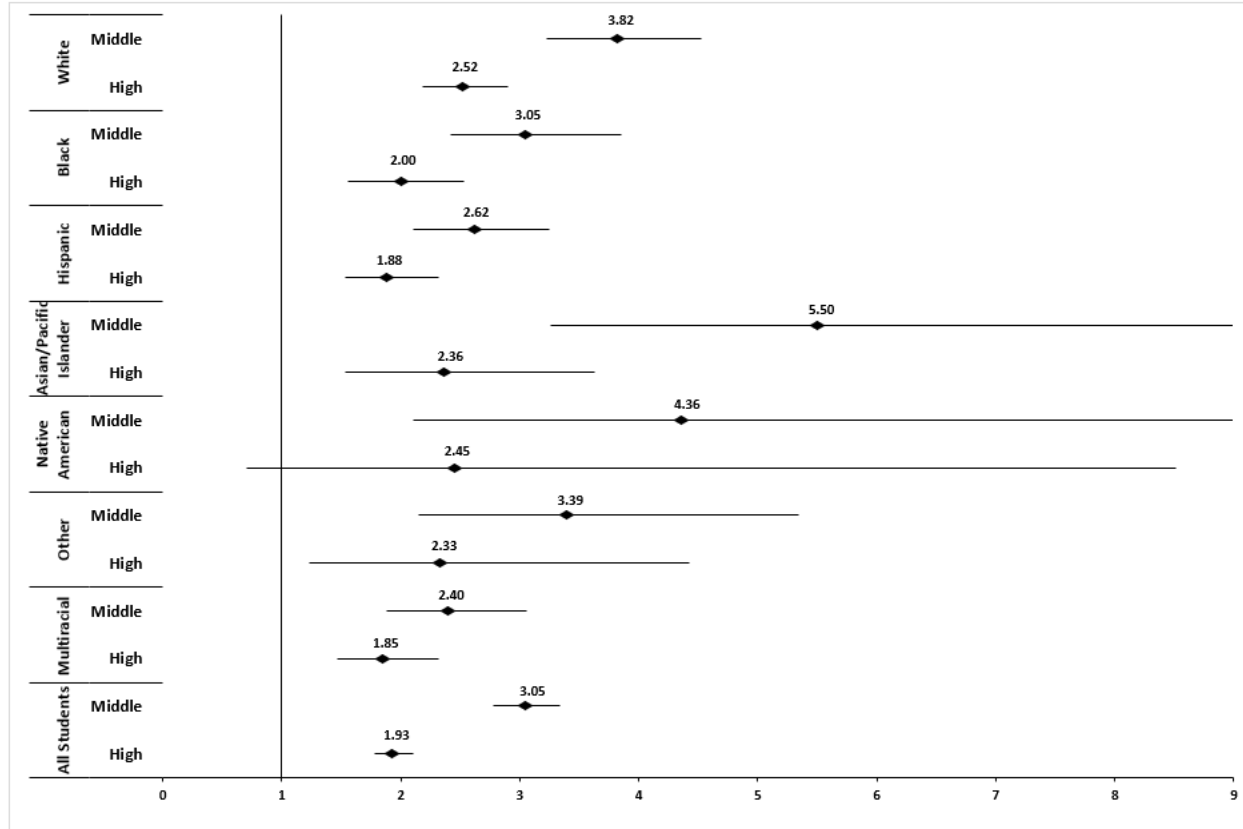

**Figure S5.** Adjusted odds of suicidal ideation among racial and ethnic minorities stratified by school level

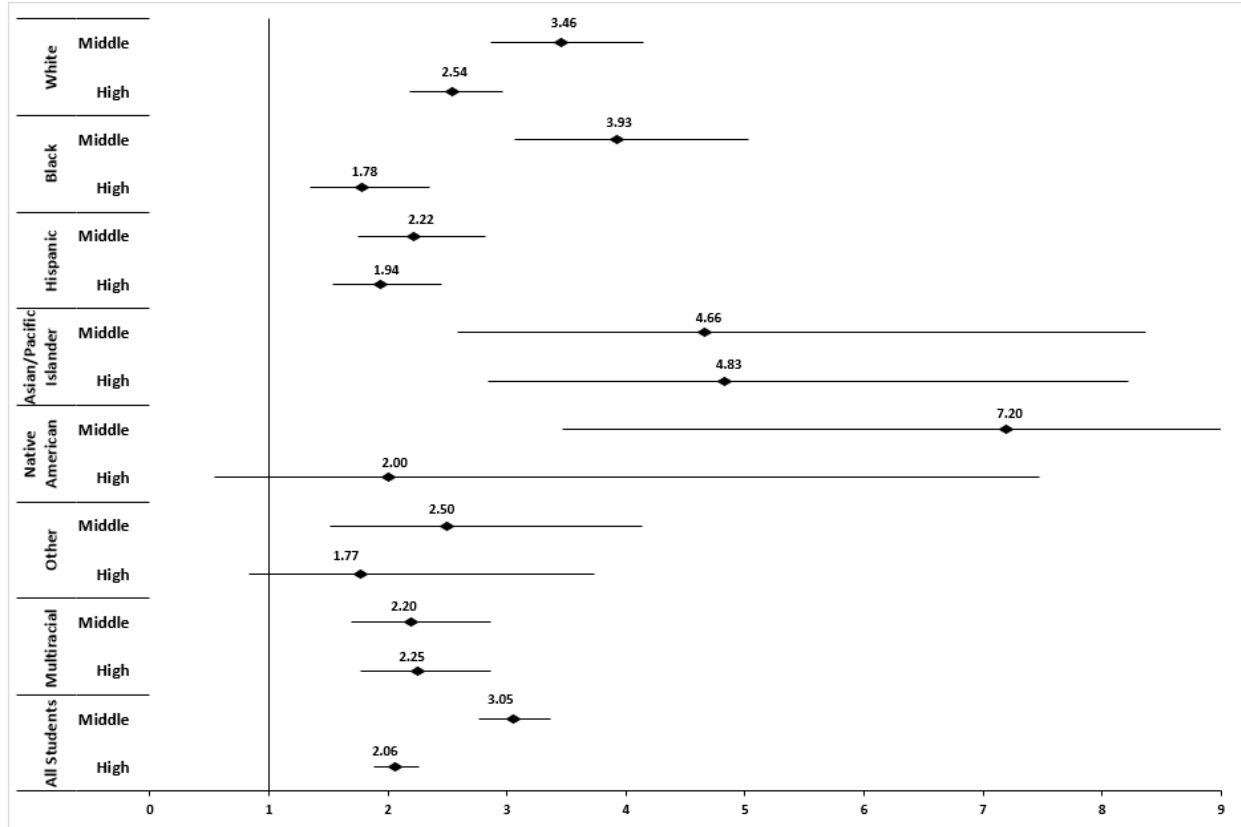

**Figure S6.** Adjusted odds of suicide attempt among racial and ethnic minorities stratified by school level

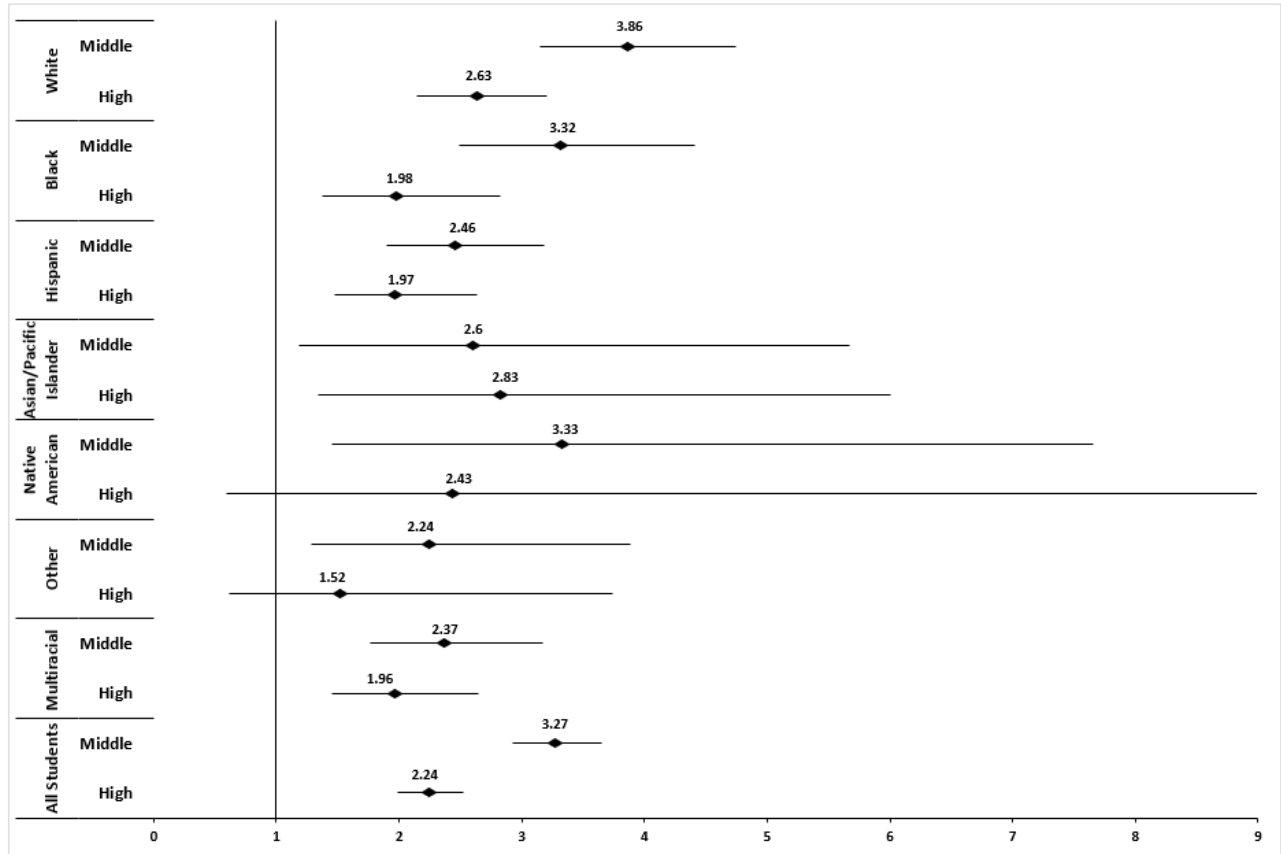

Supplement: s1 [file s1]
